# Supplementary material for: Association Between Physical Activity and Risk of Disabling Dementia in Japan
Source: PubMed Central journal article supplement (PMC8965633; doi:10.1001/jamanetworkopen.2022.4590), 2022-03-29
Supplement: jamanetwopen-e224590-s001.pdf [file jamanetwopen-e224590-s001.pdf]

## Supplemental Online Content

Ihira H, Sawada N, Inoue M, et al. Association between physical activity and risk of disabling dementia in Japan. *JAMA Netw Open*. 2022;5(3):e224590.

doi:10.1001/jamanetworkopen.2022.4590

**eFigure.** Flowchart of Study Participants

**eTable 1.** Risk of Disabling Dementia Risk According to Physical Activity in Men and Women Aged 65 Years and Older

**eTable 2.** Risk of Disabling Dementia Risk According to Physical Activity Using the Fine and Gray Subdistribution Hazards Model for Competing Risk of Death

**eTable 3.** Risk of Disabling Dementia Risk According to the Change of Daily Total Physical Activity in Men and Women

**eTable 4.** Risk of Disabling Dementia Risk According to Physical Activity in a Model Adding Education Level in Cohort I

**eAppendix.** Members of the Japan Public Health Center-based Prospective Study (JPHC) Study Group

This supplemental material has been provided by the authors to give readers additional information about their work.

**eFigure.** Flowchart of Study Participants

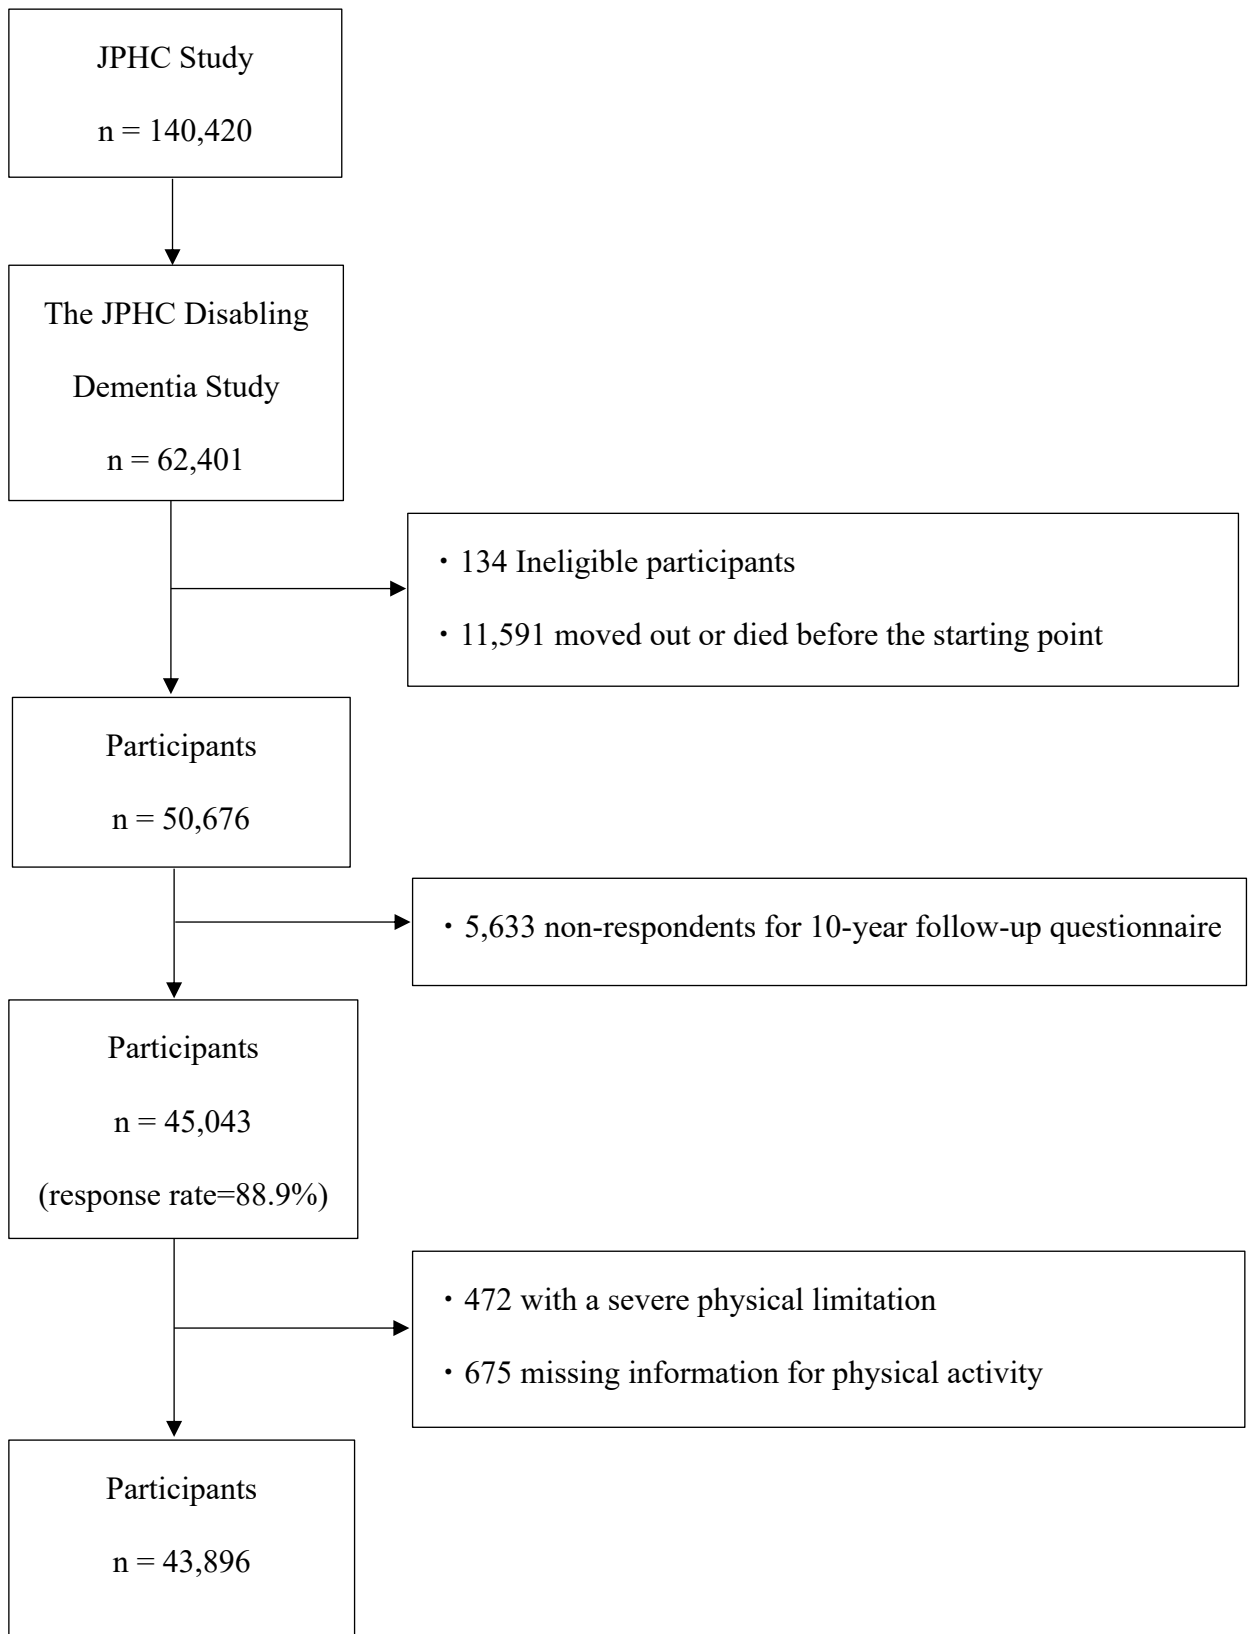

**eTable 1.** Risk of Disabling Dementia Risk According to Physical Activity in Men and Women Aged 65 Years and Older

|                               | Men                 |                     |                     |                     |         | Women               |                     |                     |                     |         |
|-------------------------------|---------------------|---------------------|---------------------|---------------------|---------|---------------------|---------------------|---------------------|---------------------|---------|
| Physical activity             | Q1                  | Q2                  | Q3                  | Q4                  | P-trend | Q1                  | Q2                  | Q3                  | Q4                  | P-trend |
| Daily total physical activity |                     |                     |                     |                     |         |                     |                     |                     |                     |         |
| Median, MET-hours/day (range) | 28.8 (22.4 to 30.4) | 32.8 (30.4 to 35.8) | 39.8 (35.8 to 45.6) | 56.0 (45.6 to 92.5) |         | 28.8 (21.8 to 30.3) | 32.3 (30.4 to 34.3) | 36.8 (34.3 to 40.6) | 47.6 (40.6 to 93.4) |         |
| Person-years                  | 11387               | 13069               | 13613               | 13391               |         | 16023               | 17429               | 18410               | 18447               |         |
| Number of cases               | 465                 | 364                 | 321                 | 314                 |         | 731                 | 593                 | 474                 | 455                 |         |
| HR <sup>a</sup> (95%CI)       | 1                   | 0.75 (0.65 to 0.86) | 0.66 (0.57 to 0.77) | 0.66 (0.57 to 0.76) | <.001   | 1                   | 0.80 (0.71 to 0.89) | 0.67 (0.59 to 0.75) | 0.69 (0.61 to 0.78) | <.001   |
| HR <sup>b</sup> (95%CI)       | 1                   | 0.76 (0.66 to 0.87) | 0.67 (0.58 to 0.78) | 0.66 (0.57 to 0.77) | <.001   | 1                   | 0.80 (0.72 to 0.89) | 0.68 (0.60 to 0.76) | 0.71 (0.63 to 0.81) | <.001   |
| Excluding first 3 years       |                     |                     |                     |                     |         |                     |                     |                     |                     |         |

|                                   |              |                        |                        |                         |       |              |                        |                        |                         |       |
|-----------------------------------|--------------|------------------------|------------------------|-------------------------|-------|--------------|------------------------|------------------------|-------------------------|-------|
| Number of cases                   | 334          | 276                    | 252                    | 247                     |       | 550          | 473                    | 377                    | 367                     |       |
| HR <sup>b</sup> (95%CI)           | 1            | 0.80 (0.68 to<br>0.94) | 0.74 (0.62 to<br>0.87) | 0.72 (0.60 to<br>0.85)  | <.001 | 1            | 0.88 (0.78 to<br>1.00) | 0.73 (0.64 to<br>0.84) | 0.78 (0.68 to<br>0.90)  | <.001 |
| Excluding first 6 years           |              |                        |                        |                         |       |              |                        |                        |                         |       |
| Number of cases                   | 219          | 179                    | 168                    | 170                     |       | 386          | 333                    | 274                    | 259                     |       |
| HR <sup>b</sup> (95%CI)           | 1            | 0.78 (0.64 to<br>0.95) | 0.74 (0.60 to<br>0.91) | 0.75 (0.61 to<br>0.93)  | .007  | 1            | 0.87 (0.75 to<br>1.01) | 0.74 (0.63 to<br>0.87) | 0.76 (0.64 to<br>0.90)  | <.001 |
| Excluding first 9 years           |              |                        |                        |                         |       |              |                        |                        |                         |       |
| Number of cases                   | 91           | 60                     | 68                     | 74                      |       | 152          | 126                    | 124                    | 110                     |       |
| HR <sup>b</sup> (95%CI)           | 1            | 0.60 (0.43 to<br>0.83) | 0.72 (0.52 to<br>0.99) | 0.79 (0.57 to<br>1.08)  | .23   | 1            | 0.84 (0.66 to<br>1.06) | 0.87 (0.68 to<br>1.12) | 0.82 (0.63 to<br>1.06)  | .17   |
| Daily total MVPA                  |              |                        |                        |                         |       |              |                        |                        |                         |       |
| Median, MET-<br>hours/day (range) | 0 (0 to 1.4) | 4.5 (1.5 to<br>9.0)    | 13.6 (9.0 to<br>22.2)  | 36.0 (22.5 to<br>111.0) |       | 0 (0 to 1.3) | 2.0 (1.5 to<br>6.0)    | 9.0 (6.0 to<br>14.9)   | 24.1 (15.0 to<br>104.8) |       |
| Person-years                      | 9957         | 14148                  | 13930                  | 13426                   |       | 14932        | 15279                  | 21451                  | 18647                   |       |

|                         |     |                        |                        |                        |       |     |                        |                        |                        |       |
|-------------------------|-----|------------------------|------------------------|------------------------|-------|-----|------------------------|------------------------|------------------------|-------|
| Number of cases         | 412 | 408                    | 330                    | 314                    |       | 672 | 528                    | 580                    | 473                    |       |
| HR <sup>a</sup> (95%CI) | 1   | 0.71 (0.62 to<br>0.82) | 0.64 (0.55 to<br>0.74) | 0.64 (0.55 to<br>0.74) | <.001 | 1   | 0.82 (0.73 to<br>0.92) | 0.69 (0.62 to<br>0.78) | 0.71 (0.63 to<br>0.80) | <.001 |
| HR <sup>b</sup> (95%CI) | 1   | 0.73 (0.63 to<br>0.84) | 0.65 (0.56 to<br>0.76) | 0.65 (0.55 to<br>0.75) | <.001 | 1   | 0.82 (0.73 to<br>0.92) | 0.70 (0.62 to<br>0.78) | 0.74 (0.65 to<br>0.83) | <.001 |
| Excluding first 3 years |     |                        |                        |                        |       |     |                        |                        |                        |       |
| Number of cases         | 339 | 253                    | 270                    | 247                    |       | 501 | 501                    | 377                    | 388                    |       |
| HR <sup>b</sup> (95%CI) | 1   | 0.73 (0.62 to<br>0.86) | 0.72 (0.61 to<br>0.85) | 0.70 (0.59 to<br>0.83) | <.001 | 1   | 0.83 (0.73 to<br>0.94) | 0.72 (0.63 to<br>0.83) | 0.78 (0.68 to<br>0.90) | <.001 |
| Excluding first 6 years |     |                        |                        |                        |       |     |                        |                        |                        |       |
| Number of cases         | 227 | 172                    | 166                    | 171                    |       | 344 | 353                    | 284                    | 271                    |       |
| HR <sup>b</sup> (95%CI) | 1   | 0.67 (0.55 to<br>0.82) | 0.67 (0.54 to<br>0.82) | 0.70 (0.57 to<br>0.87) | .001  | 1   | 0.84 (0.72 to<br>0.97) | 0.72 (0.62 to<br>0.85) | 0.78 (0.66 to<br>0.92) | .001  |
| Excluding first 9 years |     |                        |                        |                        |       |     |                        |                        |                        |       |
| Number of cases         | 84  | 69                     | 66                     | 74                     |       | 135 | 133                    | 127                    | 117                    |       |

|                               |       |                     |                     |                     |       |       |                     |                     |                     |       |
|-------------------------------|-------|---------------------|---------------------|---------------------|-------|-------|---------------------|---------------------|---------------------|-------|
| HR <sup>b</sup> (95%CI)       | 1     | 0.71 (0.51 to 0.98) | 0.73 (0.52 to 1.01) | 0.82 (0.60 to 1.13) | .26   | 1     | 0.73 (0.57 to 0.94) | 0.83 (0.65 to 1.07) | 0.82 (0.63 to 1.07) | .28   |
| Leisure-time MVPA             |       |                     |                     |                     |       |       |                     |                     |                     |       |
| Median, MET-hours/day (range) | 0     | 0.1 (0.03 to 0.4)   | 1.0 (0.4 to 2.3)    | 4.8 (2.3 to 58.5)   |       | 0     | 0.1 (0.03 to 0.3)   | 1.0 (0.3 to 2.3)    | 4.5 (2.3 to 31.5)   |       |
| Person-years                  | 18841 | 10734               | 10573               | 11313               |       | 29527 | 13814               | 14307               | 12662               |       |
| Number of cases               | 673   | 313                 | 231                 | 247                 |       | 1126  | 442                 | 361                 | 324                 |       |
| HR <sup>a</sup> (95%CI)       | 1     | 0.94 (0.82 to 1.08) | 0.67 (0.57 to 0.77) | 0.66 (0.57 to 0.77) | <.001 | 1     | 0.93 (0.83 to 1.04) | 0.72 (0.63 to 0.81) | 0.76 (0.67 to 0.86) | <.001 |
| HR <sup>b</sup> (95%CI)       | 1     | 0.95 (0.82 to 1.09) | 0.66 (0.57 to 0.77) | 0.65 (0.56 to 0.75) | <.001 | 1     | 0.95 (0.84 to 1.06) | 0.72 (0.64 to 0.81) | 0.77 (0.68 to 0.87) | <.001 |
| Excluding first 3 years       |       |                     |                     |                     |       |       |                     |                     |                     |       |
| Number of cases               | 490   | 243                 | 183                 | 193                 |       | 853   | 342                 | 311                 | 261                 |       |
| HR <sup>b</sup> (95%CI)       | 1     | 0.99 (0.85 to 1.17) | 0.69 (0.58 to 0.82) | 0.70 (0.59 to 0.83) | <.001 | 1     | 0.95 (0.83 to 1.08) | 0.80 (0.70 to 0.91) | 0.79 (0.69 to 0.91) | <.001 |

|                         |     |                        |                        |                        |       |     |                        |                        |                        |     |
|-------------------------|-----|------------------------|------------------------|------------------------|-------|-----|------------------------|------------------------|------------------------|-----|
| Excluding first 6 years |     |                        |                        |                        |       |     |                        |                        |                        |     |
| Number of cases         | 326 | 156                    | 122                    | 132                    |       | 589 | 235                    | 231                    | 197                    |     |
| HR <sup>b</sup> (95%CI) | 1   | 0.95 (0.78 to<br>1.16) | 0.66 (0.53 to<br>0.82) | 0.68 (0.56 to<br>0.84) | <.001 | 1   | 0.93 (0.80 to<br>1.09) | 0.84 (0.72 to<br>0.98) | 0.84 (0.71 to<br>0.99) | .01 |
| Excluding first 9 years |     |                        |                        |                        |       |     |                        |                        |                        |     |
| Number of cases         | 125 | 60                     | 48                     | 60                     |       | 217 | 97                     | 115                    | 83                     |     |
| HR <sup>b</sup> (95%CI) | 1   | 0.90 (0.66 to<br>1.24) | 0.67 (0.47 to<br>0.95) | 0.79 (0.57 to<br>1.09) | .05   | 1   | 0.99 (0.77 to<br>1.27) | 1.09 (0.87 to<br>1.37) | 0.93 (0.71 to<br>1.20) | .89 |

MET, metabolic equivalent; Q, quartile; HR, hazard ratio; CI, confidence interval; MVPA; moderate to vigorous physical activity

<sup>a</sup> Adjusted for age and area

<sup>b</sup> Additionally adjusted for smoking status (never, former, 1 to 19 cigarettes/day,  $\geq 20$  cigarettes/day) and alcohol intake status (none or occasional drinkers, 1 to <150g/week, 150 to <300g/week,  $\geq 300$ g/week), body mass index (<18.5, 18.5 to 24.9, 25 to 29,  $\geq 30$ ), past history of diabetes (yes, no), medication for hypertension (yes, no), and occupation (primary industry, secondary or tertiary industry, unemployed, household duties).

**eTable 2.** Risk of Disabling Dementia Risk According to Physical Activity Using the Fine and Gray Subdistribution Hazards Model for Competing Risk of Death

|                                  | Men                    |                        |                        |                        |         | Women                  |                        |                        |                        |         |
|----------------------------------|------------------------|------------------------|------------------------|------------------------|---------|------------------------|------------------------|------------------------|------------------------|---------|
| Physical activity                | Q1                     | Q2                     | Q3                     | Q4                     | P-trend | Q1                     | Q2                     | Q3                     | Q4                     | P-trend |
| Daily total physical activity    |                        |                        |                        |                        |         |                        |                        |                        |                        |         |
| Median, MET-hours/day<br>(range) | 29.6 (22.4<br>to 32.1) | 34.5 (32.1<br>to 37.5) | 42.5 (37.6<br>to 49.0) | 59.7 (49.0<br>to 92.5) |         | 29.9 (21.8<br>to 32.3) | 34.5 (32.3<br>to 36.8) | 39.8 (36.8<br>to 44.6) | 52.9 (44.6<br>to 93.4) |         |
| Person-years                     | 43881                  | 48021                  | 48277                  | 47913                  |         | 53221                  | 57776                  | 58623                  | 59314                  |         |
| Number of cases                  | 780                    | 452                    | 439                    | 422                    |         | 1226                   | 687                    | 542                    | 462                    |         |
| HR <sup>a</sup> (95%CI)          | 1                      | 0.78 (0.69<br>to 0.88) | 0.74 (0.65<br>to 0.83) | 0.79 (0.70<br>to 0.89) | <.001   | 1                      | 0.79 (0.71<br>to 0.86) | 0.74 (0.67<br>to 0.82) | 0.75 (0.67<br>to 0.85) | <.001   |
| HR <sup>b</sup> (95%CI)          | 1                      | 0.81 (0.72<br>to 0.91) | 0.76 (0.68<br>to 0.86) | 0.81 (0.71<br>to 0.92) | <.001   | 1                      | 0.82 (0.75<br>to 0.91) | 0.78 (0.70<br>to 0.87) | 0.80 (0.71<br>to 0.90) | <.001   |
| Excluding first 3 years          |                        |                        |                        |                        |         |                        |                        |                        |                        |         |
| Number of cases                  | 570                    | 356                    | 364                    | 333                    |         | 939                    | 549                    | 452                    | 381                    |         |



|                                  |                   |                        |                        |                         |     |                   |                        |                        |                         |       |
|----------------------------------|-------------------|------------------------|------------------------|-------------------------|-----|-------------------|------------------------|------------------------|-------------------------|-------|
| HR <sup>b</sup> (95%CI)          | 1                 | 0.88 (0.76<br>to 1.00) | 0.87 (0.75<br>to 0.99) | 0.87 (0.75<br>to 1.00)  | .04 | 1                 | 0.86 (0.77<br>to 0.96) | 0.85 (0.76<br>to 0.96) | 0.86 (0.75<br>to 0.98)  | 0.008 |
| Excluding first 6 years          |                   |                        |                        |                         |     |                   |                        |                        |                         |       |
| Number of cases                  | 379               | 238                    | 248                    | 239                     |     | 653               | 414                    | 319                    | 282                     |       |
| HR <sup>b</sup> (95%CI)          | 1                 | 0.87 (0.74<br>to 1.03) | 0.88 (0.74<br>to 1.04) | 0.92 (0.78<br>to 1.10)  | .30 | 1                 | 0.95 (0.84<br>to 1.08) | 0.86 (0.74<br>to 0.98) | 0.90 (0.77<br>to 1.05)  | .05   |
| Excluding first 9 years          |                   |                        |                        |                         |     |                   |                        |                        |                         |       |
| Number of cases                  | 151               | 103                    | 100                    | 114                     |     | 260               | 174                    | 155                    | 127                     |       |
| HR <sup>b</sup> (95%CI)          | 1                 | 0.95 (0.73<br>to 1.22) | 0.90 (0.69<br>to 1.17) | 1.12 (0.86<br>to 1.46)  | .60 | 1                 | 0.99 (0.81<br>to 1.21) | 1.03 (0.84<br>to 1.27) | 1.00 (0.79<br>to 1.26)  | .91   |
| Daily total MVPA                 |                   |                        |                        |                         |     |                   |                        |                        |                         |       |
| Median, MET-hours/day<br>(range) | 0.4 (0 to<br>3.2) | 6.0 (2.5 to<br>9.0)    | 16.7 (9.0<br>to 19.0)  | 42.0 (25.5<br>to 111.0) |     | 0.3 (0 to<br>2.5) | 6.0 (2.5 to<br>9.0)    | 12.1 (9.0<br>to 19.0)  | 30.8 (19.1<br>to 108.0) |       |
| Person-years                     | 44019             | 48076                  | 48147                  | 47852                   |     | 53857             | 51337                  | 64391                  | 59350                   |       |
| Number of cases                  | 768               | 449                    | 455                    | 421                     |     | 1152              | 650                    | 655                    | 460                     |       |

|                         |     |                        |                        |                        |       |     |                        |                        |                        |       |
|-------------------------|-----|------------------------|------------------------|------------------------|-------|-----|------------------------|------------------------|------------------------|-------|
| HR <sup>a</sup> (95%CI) | 1   | 0.78 (0.70<br>to 0.88) | 0.71 (0.63<br>to 0.80) | 0.78 (0.69<br>to 0.88) | <.001 | 1   | 0.84 (0.77<br>to 0.93) | 0.78 (0.71<br>to 0.86) | 0.75 (0.67<br>to 0.84) | <.001 |
| HR <sup>b</sup> (95%CI) | 1   | 0.81 (0.71<br>to 0.91) | 0.72 (0.64<br>to 0.82) | 0.79 (0.70<br>to 0.90) | <.001 | 1   | 0.89 (0.80<br>to 0.98) | 0.83 (0.75<br>to 0.92) | 0.79 (0.70<br>to 0.89) | <.001 |
| Excluding first 3 years |     |                        |                        |                        |       |     |                        |                        |                        |       |
| Number of cases         | 566 | 351                    | 374                    | 332                    |       | 876 | 578                    | 484                    | 383                    |       |
| HR <sup>b</sup> (95%CI) | 1   | 0.84 (0.73<br>to 0.97) | 0.80 (0.70<br>to 0.91) | 0.83 (0.71<br>to 0.95) | .003  | 1   | 0.93 (0.83<br>to 1.03) | 0.90 (0.80<br>to 1.01) | 0.86 (0.75<br>to 0.98) | 0.02  |
| Excluding first 6 years |     |                        |                        |                        |       |     |                        |                        |                        |       |
| Number of cases         | 377 | 235                    | 252                    | 240                    |       | 623 | 418                    | 343                    | 284                    |       |
| HR <sup>b</sup> (95%CI) | 1   | 0.83 (0.70<br>to 0.97) | 0.79 (0.67<br>to 0.93) | 0.88 (0.74<br>to 1.04) | .06   | 1   | 0.94 (0.82<br>to 1.06) | 0.87 (0.75<br>to 0.99) | 0.87 (0.75<br>to 1.01) | .03   |
| Excluding first 9 years |     |                        |                        |                        |       |     |                        |                        |                        |       |
| Number of cases         | 147 | 101                    | 107                    | 113                    |       | 263 | 158                    | 164                    | 131                    |       |

|                                  |       |                        |                        |                        |       |       |                        |                        |                        |       |
|----------------------------------|-------|------------------------|------------------------|------------------------|-------|-------|------------------------|------------------------|------------------------|-------|
| HR <sup>b</sup> (95%CI)          | 1     | 0.94 (0.73<br>to 1.22) | 0.88 (0.68<br>to 1.13) | 1.11 (0.85<br>to 1.44) | .70   | 1     | 0.86 (0.70<br>to 1.05) | 0.94 (0.76<br>to 1.15) | 0.94 (0.75<br>to 1.17) | .60   |
| Leisure-time MVPA                |       |                        |                        |                        |       |       |                        |                        |                        |       |
| Median, MET-hours/day<br>(range) | 0     | 0.1 (0.03<br>to 0.3)   | 0.9 (0.3 to<br>1.6)    | 3.8 (1.6 to<br>58.5)   |       | 0     | 0.1 (0.03<br>to 0.3)   | 0.8 (0.3 to<br>1.7)    | 3.8 (1.7 to<br>58.5)   |       |
| Person-years                     | 54214 | 46444                  | 43611                  | 43825                  |       | 76689 | 50942                  | 49662                  | 51642                  |       |
| Number of cases                  | 930   | 443                    | 307                    | 413                    |       | 1420  | 540                    | 451                    | 506                    |       |
| HR <sup>a</sup> (95%CI)          | 1     | 0.92 (0.82<br>to 1.03) | 0.67 (0.59<br>to 0.76) | 0.65 (0.58<br>to 0.73) | <.001 | 1     | 0.91 (0.82<br>to 1.01) | 0.78 (0.71<br>to 0.87) | 0.71 (0.64<br>to 0.79) | <.001 |
| HR <sup>b</sup> (95%CI)          | 1     | 0.95 (0.84<br>to 1.07) | 0.69 (0.61<br>to 0.79) | 0.66 (0.59<br>to 0.75) | <.001 | 1     | 0.96 (0.86<br>to 1.07) | 0.83 (0.74<br>to 0.92) | 0.75 (0.67<br>to 0.83) | <.001 |
| Excluding first 3 years          |       |                        |                        |                        |       |       |                        |                        |                        |       |
| Number of cases                  | 695   | 351                    | 243                    | 334                    |       | 1085  | 430                    | 393                    | 413                    |       |
| HR <sup>b</sup> (95%CI)          | 1     | 0.98 (0.86<br>to 1.12) | 0.72 (0.62<br>to 0.83) | 0.71 (0.62<br>to 0.81) | <.001 | 1     | 0.97 (0.86<br>to 1.09) | 0.92 (0.81<br>to 1.03) | 0.77 (0.69<br>to 0.87) | <.001 |

|                                                                                                                                                                                                                                                                                                                                                                                                                                                              |     |                        |                        |                        |       |     |                        |                        |                        |      |
|--------------------------------------------------------------------------------------------------------------------------------------------------------------------------------------------------------------------------------------------------------------------------------------------------------------------------------------------------------------------------------------------------------------------------------------------------------------|-----|------------------------|------------------------|------------------------|-------|-----|------------------------|------------------------|------------------------|------|
| Excluding first 6 years                                                                                                                                                                                                                                                                                                                                                                                                                                      |     |                        |                        |                        |       |     |                        |                        |                        |      |
| Number of cases                                                                                                                                                                                                                                                                                                                                                                                                                                              | 470 | 239                    | 167                    | 228                    |       | 754 | 303                    | 297                    | 314                    |      |
| HR <sup>b</sup> (95%CI)                                                                                                                                                                                                                                                                                                                                                                                                                                      | 1   | 0.96 (0.81<br>to 1.13) | 0.70 (0.58<br>to 0.84) | 0.69 (0.58<br>to 0.81) | <.001 | 1   | 0.97 (0.84<br>to 1.12) | 0.99 (0.86<br>to 1.13) | 0.83 (0.73<br>to 0.96) | 0.02 |
| Excluding first 9 years                                                                                                                                                                                                                                                                                                                                                                                                                                      |     |                        |                        |                        |       |     |                        |                        |                        |      |
| Number of cases                                                                                                                                                                                                                                                                                                                                                                                                                                              | 184 | 98                     | 77                     | 109                    |       | 290 | 132                    | 145                    | 149                    |      |
| HR <sup>b</sup> (95%CI)                                                                                                                                                                                                                                                                                                                                                                                                                                      | 1   | 0.94 (0.73<br>to 1.23) | 0.81 (0.61<br>to 1.07) | 0.84 (0.66<br>to 1.08) | .11   | 1   | 1.04 (0.84<br>to 1.29) | 1.19 (0.97<br>to 1.47) | 0.98 (0.80<br>to 1.21) | .73  |
| MET, metabolic equivalent; Q, quartile; HR, hazard ratio; CI, confidence interval; MVPA; moderate to vigorous physical activity                                                                                                                                                                                                                                                                                                                              |     |                        |                        |                        |       |     |                        |                        |                        |      |
| <sup>a</sup> Adjusted for age and area                                                                                                                                                                                                                                                                                                                                                                                                                       |     |                        |                        |                        |       |     |                        |                        |                        |      |
| <sup>b</sup> Additionally adjusted for smoking status (never, former, 1 to 19 cigarettes/day, ≥20 cigarettes/day) and alcohol intake status (none or occasional drinkers, 1 to <150g/week, 150 to <300g/week, ≥ 300g/week), body mass index (<18.5, 18.5 to 24.9, 25 to 29, ≥30) and past history of diabetes (yes, no), medication for hypertension (yes, no), occupation (primary industry, secondary or tertiary industry, unemployed, household duties). |     |                        |                        |                        |       |     |                        |                        |                        |      |

**eTable 3.** Risk of Disabling Dementia Risk According to the Change of Daily Total Physical Activity in Men and Women

|                                         |                 |                        |                        |                        |                        |                        |                        |                        |                        |
|-----------------------------------------|-----------------|------------------------|------------------------|------------------------|------------------------|------------------------|------------------------|------------------------|------------------------|
| Men                                     |                 |                        |                        |                        |                        |                        |                        |                        |                        |
| Change in daily total physical activity | Q05G3–<br>Q10G3 | Q05G3–<br>Q10G2        | Q05G3–<br>Q10G1        | Q05G2–<br>Q10G3        | Q05G2–<br>Q10G2        | Q05G2–<br>Q10G1        | Q05G1–<br>Q10G3        | Q05G1–<br>Q10G2        | Q05G1–<br>Q10G1        |
| Person-years                            | 30842           | 20562                  | 13341                  | 17296                  | 23412                  | 21040                  | 7438                   | 11932                  | 17765                  |
| Number of cases                         | 230             | 183                    | 244                    | 165                    | 202                    | 303                    | 82                     | 124                    | 256                    |
| HR <sup>a</sup> (95%CI)                 | 1               | 0.98 (0.81 to<br>1.19) | 1.64 (1.37 to<br>1.97) | 1.35 (1.10 to<br>1.64) | 1.16 (0.96 to<br>1.41) | 1.40 (1.18<br>to 1.67) | 1.51 (1.17 to<br>1.95) | 1.45 (1.16 to<br>1.80) | 1.58 (1.31 to<br>1.89) |
| HR <sup>b</sup> (95%CI)                 | 1               | 0.99 (0.82 to<br>1.21) | 1.61 (1.33 to<br>1.93) | 1.31 (1.07 to<br>1.61) | 1.17 (0.97 to<br>1.42) | 1.38 (1.16<br>to 1.66) | 1.48 (1.15 to<br>1.91) | 1.43 (1.15 to<br>1.79) | 1.55 (1.29 to<br>1.87) |
| Women                                   |                 |                        |                        |                        |                        |                        |                        |                        |                        |
| Change in daily total physical activity | Q05G3–<br>Q10G3 | Q05G3–<br>Q10G2        | Q05G3–<br>Q10G1        | Q05G2–<br>Q10G3        | Q05G2–<br>Q10G2        | Q05G2–<br>Q10G1        | Q05G1–<br>Q10G3        | Q05G1–<br>Q10G2        | Q05G1–<br>Q10G1        |
| Person-years                            | 28996           | 20680                  | 12982                  | 16844                  | 21735                  | 23197                  | 18355                  | 26777                  | 33835                  |
| Number of cases                         | 643             | 221                    | 139                    | 315                    | 226                    | 178                    | 350                    | 244                    | 229                    |

|                         |   |                        |                        |                        |                        |                        |                        |                        |                        |
|-------------------------|---|------------------------|------------------------|------------------------|------------------------|------------------------|------------------------|------------------------|------------------------|
| HR <sup>a</sup> (95%CI) | 1 | 1.04 (0.87 to<br>1.25) | 1.46 (1.23 to<br>1.73) | 1.10 (0.90 to<br>1.34) | 1.13 (0.94 to<br>1.35) | 1.30 (1.09<br>to 1.54) | 1.37 (1.11 to<br>1.69) | 1.25 (1.04 to<br>1.51) | 1.61 (1.38 to<br>1.88) |
| HR <sup>b</sup> (95%CI) | 1 | 1.06 (0.89 to<br>1.28) | 1.43 (1.21 to<br>1.70) | 1.12 (0.92 to<br>1.36) | 1.13 (0.94 to<br>1.36) | 1.25 (1.05<br>to 1.49) | 1.38 (1.11 to<br>1.70) | 1.24 (1.03 to<br>1.50) | 1.55 (1.32 to<br>1.81) |

HR, hazard ratios; CI, confidence interval; Q05, 5-year questionnaire; Q10, 10-year questionnaire

Q05: G1 <27.1; G2 27.1-34.3 G3 ≥34.3, Q10: G1 <33.8 ; G2 33.8-44.1; G3 ≥44.1 for men

Q05: G1 <28.3 ; G2 28.3-34.3 ; G3 ≥34.3, Q10: G1 <33.8; G2 33.8–41.4; G3 ≥41.4 for women

<sup>a</sup> Adjusted for age and area

<sup>b</sup> Adjusted for age, area, smoking status (never, former, 1 to 19 cigarettes/day, ≥20 cigarettes/day), alcohol intake status (none or occasional drinkers, 1 to <150g/week, 150 to <300g/week, ≥ 300g/week), body mass index (<18.5, 18.5 to 24.9, 25 to 29, ≥30), past history of diabetes (yes, no), medication for hypertension (yes, no), and occupation (primary industry, secondary or tertiary industry, unemployed, household duties).

**eTable 4.** Risk of Disabling Dementia Risk According to Physical Activity in a Model Adding Education Level in Cohort I

|                               | Men   |                     |                     |                     |         | Women |                     |                     |                     |         |
|-------------------------------|-------|---------------------|---------------------|---------------------|---------|-------|---------------------|---------------------|---------------------|---------|
| Physical activity             | Q1    | Q2                  | Q3                  | Q4                  | P-trend | Q1    | Q2                  | Q3                  | Q4                  | P-trend |
| Daily total physical activity |       |                     |                     |                     |         |       |                     |                     |                     |         |
| Median (MET-hours/day)        | 29.7  | 35.0                | 43.6                | 60.9                |         | 30.1  | 34.7                | 40.0                | 52.9                |         |
| Person-years                  | 21898 | 23186               | 23152               | 22654               |         | 27469 | 28289               | 28305               | 28694               |         |
| Number of cases               | 314   | 194                 | 202                 | 192                 |         | 400   | 306                 | 257                 | 210                 |         |
| HR <sup>a</sup> (95%CI)       | 1     | 0.68 (0.57 to 0.82) | 0.67 (0.56 to 0.80) | 0.74 (0.61 to 0.88) | < .001  | 1     | 0.87 (0.75 to 1.01) | 0.78 (0.67 to 0.92) | 0.76 (0.64 to 0.90) | < .001  |
| HR <sup>b</sup> (95%CI)       | 1     | 0.75 (0.62 to 0.90) | 0.73 (0.61 to 0.87) | 0.77 (0.63 to 0.93) | .003    | 1     | 0.94 (0.79 to 1.11) | 0.86 (0.72 to 1.03) | 0.82 (0.67 to 1.01) | .03     |
| Excluding first 3 years       |       |                     |                     |                     |         |       |                     |                     |                     |         |
| Number of cases               | 229   | 159                 | 166                 | 145                 |         | 311   | 246                 | 208                 | 168                 |         |

|                            |       |                        |                        |                        |     |       |                        |                        |                        |     |
|----------------------------|-------|------------------------|------------------------|------------------------|-----|-------|------------------------|------------------------|------------------------|-----|
| HR <sup>b</sup> (95%CI)    | 1     | 0.85 (0.69<br>to 1.05) | 0.82 (0.67<br>to 1.01) | 0.78 (0.63<br>to 0.98) | .03 | 1     | 0.94 (0.79<br>to 1.11) | 0.86 (0.72<br>to 1.03) | 0.82 (0.67<br>to 1.01) | .11 |
| Excluding first 6 years    |       |                        |                        |                        |     |       |                        |                        |                        |     |
| Number of cases            | 161   | 96                     | 117                    | 103                    |     | 224   | 182                    | 147                    | 126                    |     |
| HR <sup>b</sup> (95%CI)    | 1     | 0.73 (0.56<br>to 0.94) | 0.82 (0.64<br>to 1.05) | 0.78 (0.60<br>to 1.02) | .10 | 1     | 0.97 (0.79<br>to 1.18) | 0.85 (0.69<br>to 1.05) | 0.86 (0.68<br>to 1.09) | .11 |
| Excluding first 9 years    |       |                        |                        |                        |     |       |                        |                        |                        |     |
| Number of cases            | 64    | 40                     | 50                     | 47                     |     | 87    | 70                     | 65                     | 63                     |     |
| HR <sup>b</sup> (95%CI)    | 1     | 0.76 (0.51<br>to 1.13) | 0.91 (0.62<br>to 1.33) | 0.92 (0.62<br>to 1.38) | .81 | 1     | 0.93 (0.68<br>to 1.28) | 0.97 (0.70<br>to 1.35) | 1.12 (0.79<br>to 1.60) | .58 |
| Total MVPA                 |       |                        |                        |                        |     |       |                        |                        |                        |     |
| Median (MET-<br>hours/day) | 0.5   | 6.4                    | 18.0                   | 42.5                   |     | 0.3   | 6.0                    | 12.1                   | 30.7                   |     |
| Person-years               | 21921 | 23137                  | 23168                  | 22666                  |     | 27796 | 24655                  | 31645                  | 28661                  |     |
| Number of cases            | 315   | 182                    | 208                    | 197                    |     | 389   | 265                    | 314                    | 205                    |     |



|                         |     |                        |                        |                        |        |     |                        |                        |                        |        |
|-------------------------|-----|------------------------|------------------------|------------------------|--------|-----|------------------------|------------------------|------------------------|--------|
| HR <sup>a</sup> (95%CI) | 1   | 0.65 (0.54<br>to 0.78) | 0.64 (0.54<br>to 0.76) | 0.74 (0.62<br>to 0.88) | < .001 | 1   | 0.85 (0.73<br>to 1.00) | 0.81 (0.70<br>to 0.94) | 0.71 (0.60<br>to 0.84) | < .001 |
| HR <sup>b</sup> (95%CI) | 1   | 0.70 (0.58<br>to 0.84) | 0.69 (0.57<br>to 0.82) | 0.77 (0.64<br>to 0.93) | .002   | 1   | 0.87 (0.74<br>to 1.02) | 0.85 (0.73<br>to 0.99) | 0.74 (0.62<br>to 0.88) | .001   |
| Excluding first 3 years |     |                        |                        |                        |        |     |                        |                        |                        |        |
| Number of cases         | 232 | 149                    | 166                    | 152                    |        | 305 | 210                    | 251                    | 167                    |        |
| HR <sup>b</sup> (95%CI) | 1   | 0.77 (0.62<br>to 0.95) | 0.73 (0.59<br>to 0.89) | 0.78 (0.63<br>to 0.97) | .01    | 1   | 0.90 (0.75<br>to 1.08) | 0.87 (0.73<br>to 1.03) | 0.77 (0.63<br>to 0.94) | .01    |
| Excluding first 6 years |     |                        |                        |                        |        |     |                        |                        |                        |        |
| Number of cases         | 159 | 94                     | 118                    | 106                    |        | 220 | 152                    | 183                    | 124                    |        |
| HR <sup>b</sup> (95%CI) | 1   | 0.69 (0.54<br>to 0.90) | 0.74 (0.58<br>to 0.94) | 0.78 (0.60<br>to 1.01) | .05    | 1   | 0.90 (0.73<br>to 1.11) | 0.87 (0.72<br>to 1.06) | 0.79 (0.62<br>to 0.99) | .04    |
| Excluding first 9 years |     |                        |                        |                        |        |     |                        |                        |                        |        |
| Number of cases         | 63  | 39                     | 49                     | 50                     |        | 87  | 72                     | 63                     | 63                     |        |

|                            |       |                        |                        |                        |        |       |                        |                        |                        |        |
|----------------------------|-------|------------------------|------------------------|------------------------|--------|-------|------------------------|------------------------|------------------------|--------|
| HR <sup>b</sup> (95%CI)    | 1     | 0.71 (0.47<br>to 1.05) | 0.80 (0.54<br>to 1.17) | 0.94 (0.63<br>to 1.39) | .75    | 1     | 0.91 (0.66<br>to 1.24) | 0.86 (0.62<br>to 1.20) | 1.04 (0.73<br>to 1.46) | .97    |
| Leisure-time MVPA          |       |                        |                        |                        |        |       |                        |                        |                        |        |
| Median (MET-<br>hours/day) | 0     | 0.2                    | 1.1                    | 4.5                    |        | 0     | 0.2                    | 1.1                    | 4.5                    |        |
| Person-years               | 34114 | 19211                  | 20014                  | 17552                  |        | 49053 | 21809                  | 22000                  | 19895                  |        |
| Number of cases            | 450   | 147                    | 159                    | 146                    |        | 632   | 178                    | 175                    | 188                    |        |
| HR <sup>a</sup> (95%CI)    | 1     | 0.72 (0.60<br>to 0.87) | 0.61 (0.50<br>to 0.73) | 0.54 (0.45<br>to 0.65) | < .001 | 1     | 0.79 (0.67<br>to 0.93) | 0.68 (0.57<br>to 0.80) | 0.73 (0.62<br>to 0.86) | < .001 |
| HR <sup>b</sup> (95%CI)    | 1     | 0.76 (0.63<br>to 0.92) | 0.65 (0.54<br>to 0.79) | 0.57 (0.46<br>to 0.69) | < .001 | 1     | 0.81 (0.69<br>to 0.97) | 0.70 (0.59<br>to 0.83) | 0.75 (0.63<br>to 0.89) | < .001 |
| Excluding first 3 years    |       |                        |                        |                        |        |       |                        |                        |                        |        |
| Number of cases            | 344   | 111                    | 128                    | 116                    |        | 487   | 145                    | 153                    | 148                    |        |
| HR <sup>b</sup> (95%CI)    | 1     | 0.74 (0.60<br>to 0.92) | 0.70 (0.56<br>to 0.86) | 0.58 (0.47<br>to 0.73) | < .001 | 1     | 0.86 (0.71<br>to 1.04) | 0.80 (0.66<br>to 0.96) | 0.76 (0.63<br>to 0.92) | .001   |

|                         |     |                        |                        |                        |        |     |                        |                        |                        |     |
|-------------------------|-----|------------------------|------------------------|------------------------|--------|-----|------------------------|------------------------|------------------------|-----|
| Excluding first 6 years |     |                        |                        |                        |        |     |                        |                        |                        |     |
| Number of cases         | 233 | 78                     | 88                     | 78                     |        | 351 | 103                    | 115                    | 110                    |     |
| HR <sup>b</sup> (95%CI) | 1   | 0.75 (0.58<br>to 0.98) | 0.69 (0.54<br>to 0.89) | 0.56 (0.42<br>to 0.73) | < .001 | 1   | 0.84 (0.68<br>to 1.06) | 0.82 (0.66<br>to 1.02) | 0.78 (0.62<br>to 0.97) | .01 |
| Excluding first 9 years |     |                        |                        |                        |        |     |                        |                        |                        |     |
| Number of cases         | 86  | 42                     | 38                     | 35                     |        | 135 | 43                     | 56                     | 51                     |     |
| HR <sup>b</sup> (95%CI) | 1   | 1.12 (0.76<br>to 1.64) | 0.82 (0.55<br>to 1.23) | 0.69 (0.46<br>to 1.04) | .05    | 1   | 0.88 (0.63<br>to 1.25) | 1.01 (0.74<br>to 1.39) | 0.89 (0.64<br>to 1.24) | .59 |

MET, metabolic equivalent; Q, quartile; HR, hazard ratio; CI, confidence interval; MVPA; moderate to vigorous physical activity

<sup>a</sup> Adjusted for age and area

<sup>b</sup> Additionally adjusted for smoking status (never, former, 1 to 19 cigarettes/day,  $\geq 20$  cigarettes/day) and alcohol intake status (none or occasional drinkers, 1 to <150g/week, 150 to <300g/week,  $\geq 300$ g/week), body mass index (<18.5, 18.5 to 24.9, 25 to 29,  $\geq 30$ ), past history of diabetes (yes, no), medication for hypertension (yes, no), occupation (primary industry, secondary or tertiary industry, unemployed, household duties) and education level (junior high school, higher education).

**eAppendix.** Members of the JPHC Study Group

Members of the JPHC Study Group are listed in <https://epi.ncc.go.jp/en/jphc/781/8390.html>
